# Supplementary material for: CellMAPtracer: A User-Friendly Tracking Tool for Long-Term Migratory and Proliferating Cells Associated with FUCCI Systems
Source: Cells. 2021 Feb 22;10(2):469. doi: 10.3390/cells10020469 (PMC7927118; doi:10.3390/cells10020469)
Supplement: Supplementary file 1 [file cells-10-00469-s001.zip]

Archive with 5 entries (5 files):
- CellMAPtracer Supplementary Materials/CellMAPtracer Supplementary Materials.pdf
- CellMAPtracer Supplementary Materials/Supplementary Data S1.xls
- CellMAPtracer Supplementary Materials/Supplementary Table S1.pdf
- CellMAPtracer Supplementary Materials/Supplementary Video S1.mp4
- CellMAPtracer Supplementary Materials/Supplementary Video S2.mp4
