# Supplementary material for: CellMAPtracer: A User-Friendly Tracking Tool for Long-Term Migratory and Proliferating Cells Associated with FUCCI Systems
Source: Cells. 2021 Feb 22;10(2):469. doi: 10.3390/cells10020469 (PMC7927118; doi:10.3390/cells10020469)
Supplement: Supplementary file 1 [file cells-10-00469-s001.zip › CellMAPtracer Supplementary Materials/Supplementary Data S1.xls]

## Sheet: Sheet1
Gold truth CellID	Gold truth Frame	Gold truth Xi	Gold truth Yi		CellName	ImageNum	Xii	Yii	Manual intervention		∆X=I Xi- Xii I	∆Y=I Yi- Yii I
2	0	250	259		C22	1	248	258			2	1
2	1	250	259		C22	2	246	257			4	2
2	2	257	257		C22	3	246	256			11	1
2	3	258	257		C22	4	247	257			11	0
2	4	255	253		C22	5	247	256			8	3
2	5	255	253		C22	6	246	255			9	2
2	6	249	245		C22	7	246	255			3	10
2	7	248	249		C22	8	247	253			1	4
2	8	248	249		C22	9	247	252			1	3
2	9	248	250		C22	10	248	253			0	3
2	10	251	254		C22	11	247	252			4	2
2	11	253	250		C22	12	247	254			6	4
2	12	259	243		C22	13	245	257			14	14
2	13	259	243		C22	14	245	259			14	16
2	14	250	240		C22	15	251	239	1		1	1
2	15	250	242		C22	16	253	241			3	1
2	16	250	241		C22	17	251	243			1	2
2	17	250	241		C22	18	249	243			1	2
2	18	250	241		C22	19	252	247			2	6
2	19	250	241		C22	20	254	244			4	3
2	20	250	241		C22	21	254	245			4	4
2	21	253	248		C22	22	253	245			0	3
2	22	254	249		C22	23	253	245			1	4
2	23	254	249		C22	24	252	247			2	2
2	24	252	249		C22	25	251	247			1	2
2	25	251	248		C22	26	251	247			0	1
2	26	249	248		C22	27	252	249			3	1
2	27	247	248		C22	28	253	249			6	1
2	28	247	248		C22	29	252	249			5	1
2	29	247	248		C22	30	254	247			7	1
2	30	239	248		C22	31	230	256			9	8
2	31	239	248		C22	32	229	256	1		10	8
2	32	227	239		C22	33	227	256			0	17
Correction Rate									0.0606061
Mean Difference (Pixel)											4.5625	4.125
Mean Difference (micron)											1.095	0.99
5	0	669	294		C10	1	669	296			0	2
5	1	668	293		C10	2	666	292			2	1
5	2	662	286		C10	3	663	288			1	2
5	3	659	282		C10	4	659	284			0	2
5	4	658	282		C10	5	658	284			0	2
5	5	654	287		C10	6	656	285			2	2
5	6	654	286		C10	7	656	284			2	2
5	7	654	284		C10	8	657	283			3	1
5	8	652	277		C10	9	653	277			1	0
5	9	652	277		C10	10	651	273			1	4
5	10	650	270		C10	11	648	273			2	3
5	11	650	270		C10	12	646	272			4	2
5	12	644	270		C10	13	642	268			2	2
5	13	642	267		C10	14	639	269			3	2
5	14	641	267		C10	15	639	268			2	1
5	15	640	266		C10	16	639	267			1	1
5	16	638	261		C10	17	636	264			2	3
5	17	638	261		C10	18	634	261			4	0
5	18	635	259		C10	19	633	261			2	2
5	19	631	255		C10	20	632	256			1	1
5	20	631	254		C10	21	630	254			1	0
5	21	631	248		C10	22	630	250			1	2
5	22	625	243		C10	23	625	246			0	3
5	23	622	237		C10	24	622	241			0	4
5	24	615	234		C10	25	615	236			0	2
5	25	610	230		C10	26	611	233			1	3
5	26	606	229		C10	27	609	233			3	4
5	27	607	230		C10	28	607	231			0	1
5	28	604	226		C10	29	603	227			1	1
5	29	602	224		C10	30	602	225			0	1
5	30	601	229		C10	31	604	228			3	1
5	31	603	227		C10	32	606	228			3	1
5	32	604	226		C10	33	604	228			0	2
5	33	604	220		C10	34	602	218			2	2
5	34	599	212		C10	35	600	212			1	0
5	35	598	198		C10	36	600	203	1		2	5
5	36	599	203		C10	37	599	206			0	3
5	37	598	207		C10	38	598	208			0	1
5	38	600	210		C10	39	600	210			0	0
5	39	598	212		C10	40	601	212			3	0
5	40	600	210		C10	41	602	212			2	2
5	41	593	211		C10	42	601	214			8	3
5	42	585	194		C10	43	586	196	1		1	2
5	43	579	182		C10	44	579	184	1		0	2
Correction Rate									0.0681818
Mean Difference (Pixel)											1.52273	1.81818
Mean Difference (micron)											0.365455	0.436364
9	0	566	324		C11	1	566	326			0	2
9	1	563	322		C11	2	565	325			2	3
9	2	567	325		C11	3	567	326			0	1
9	3	568	324		C11	4	568	326			0	2
9	4	568	328		C11	5	569	328			1	0
9	5	567	331		C11	6	567	331			0	0
9	6	565	333		C11	7	566	332			1	1
9	7	564	331		C11	8	564	334			0	3
9	8	561	337		C11	9	563	334			2	3
9	9	565	331		C11	10	564	332			1	1
9	10	563	332		C11	11	564	331			1	1
9	11	562	329		C11	12	562	332			0	3
9	12	562	330		C11	13	562	332			0	2
9	13	561	330		C11	14	559	332			2	2
9	14	560	327		C11	15	558	331			2	4
9	15	560	328		C11	16	558	326			2	2
9	16	557	328		C11	17	557	327			0	1
9	17	554	331		C11	18	556	329			2	2
9	18	557	327		C11	19	558	330			1	3
9	19	558	330		C11	20	559	331			1	1
9	20	562	331		C11	21	560	332			2	1
9	21	562	331		C11	22	562	332			0	1
9	22	562	331		C11	23	563	333			1	2
9	23	562	331		C11	24	563	336			1	5
9	24	563	334		C11	25	567	337			4	3
9	25	566	335		C11	26	570	338			4	3
9	26	571	338		C11	27	572	338			1	0
9	27	572	338		C11	28	571	340			1	2
9	28	573	337		C11	29	573	338			0	1
9	29	575	335		C11	30	575	339			0	4
9	30	574	335		C11	31	574	338			0	3
9	31	576	337		C11	32	574	338			2	1
9	32	575	338		C11	33	573	338			2	0
9	33	576	336		C11	34	576	337			0	1
9	34	577	336		C11	35	575	336			2	0
9	35	576	335		C11	36	576	336			0	1
9	36	576	337		C11	37	577	337			1	0
9	37	578	340		C11	38	579	337			1	3
9	38	582	337		C11	39	582	338			0	1
9	39	583	335		C11	40	585	336			2	1
9	40	586	334		C11	41	587	335			1	1
9	41	590	333		C11	42	589	337			1	4
9	42	591	335		C11	43	590	339			1	4
9	43	591	336		C11	44	592	339			1	3
9	44	591	337		C11	45	592	338			1	1
9	45	591	338		C11	46	593	341			2	3
9	46	594	340		C11	47	593	343			1	3
9	47	594	341		C11	48	593	343			1	2
9	48	594	343		C11	49	593	344			1	1
9	49	592	344		C11	50	591	347			1	3
9	50	591	345		C11	51	591	354			0	9
9	51	589	355		C11	52	591	356			2	1
9	52	588	360		C11	53	590	360			2	0
9	53	588	363		C11	54	586	363			2	0
9	54	588	365		C11	55	585	365			3	0
9	55	584	366		C11	56	585	368			1	2
9	56	583	367		C11	57	582	369			1	2
9	57	580	371		C11	58	582	372			2	1
9	58	582	373		C11	59	581	376			1	3
9	59	584	379		C11	60	584	381			0	2
9	60	584	379		C11	61	589	387			5	8
9	61	590	386		C11	62	590	390			0	4
9	62	590	391		C11	63	590	394			0	3
9	63	590	397		C11	64	590	398			0	1
9	64	590	405		C11	65	589	403			1	2
9	65	585	407		C11	66	589	408			4	1
9	66	587	415		C11	67	590	413			3	2
9	67	587	416		C11	68	588	415			1	1
9	68	586	418		C11	69	588	418			2	0
9	69	586	419		C11	70	588	422			2	3
9	70	586	422		C11	71	588	425			2	3
9	71	588	425		C11	72	585	427			3	2
9	72	585	427		C11	73	584	428			1	1
9	73	582	427		C11	74	583	429			1	2
9	74	582	427		C11	75	585	429			3	2
9	75	582	427		C11	76	584	431			2	4
9	76	582	427		C11	77	584	431			2	4
9	77	582	430		C11	78	584	429			2	1
9	78	582	430		C11	79	582	431			0	1
9	79	582	430		C11	80	580	434			2	4
9	80	579	433		C11	81	581	436			2	3
9	81	580	441		C11	82	581	441			1	0
9	82	581	441		C11	83	581	443			0	2
9	83	583	446		C11	84	584	444			1	2
Correction Rate									0
Mean Difference (Pixel)											1.27381	2.03571
Mean Difference (micron)											0.305714	0.488571
12	0	467	317		C12	1	469	314			2	3
12	1	470	318		C12	2	467	316			3	2
12	2	473	318		C12	3	468	318			5	0
12	3	475	317		C12	4	468	315			7	2
12	4	472	311		C12	5	468	315			4	4
12	5	471	310		C12	6	471	313			0	3
12	6	470	315		C12	7	473	314			3	1
12	7	471	309		C12	8	473	313			2	4
12	8	471	315		C12	9	474	313			3	2
12	9	470	313		C12	10	475	312			5	1
12	10	472	308		C12	11	475	313			3	5
12	11	472	311		C12	12	474	313			2	2
12	12	473	310		C12	13	475	314			2	4
12	13	473	316		C12	14	475	315			2	1
12	14	473	312		C12	15	476	313			3	1
12	15	474	311		C12	16	476	314			2	3
12	16	474	311		C12	17	475	314			1	3
12	17	478	315		C12	18	476	311			2	4
12	18	478	315		C12	19	474	312			4	3
12	19	478	315		C12	20	477	311			1	4
12	20	478	315		C12	21	475	311			3	4
12	21	478	315		C12	22	477	314			1	1
12	22	475	307		C12	23	477	313			2	6
12	23	478	312		C12	24	477	313			1	1
12	24	476	313		C12	25	476	314			0	1
12	25	480	310		C12	26	475	315			5	5
12	26	481	308		C12	27	475	311			6	3
12	27	480	312		C12	28	478	311			2	1
12	28	483	312		C12	29	477	311			6	1
12	29	482	309		C12	30	479	308			3	1
12	30	481	309		C12	31	479	309			2	0
12	31	482	311		C12	32	481	309			1	2
12	32	480	306		C12	33	482	310			2	4
12	33	484	312		C12	34	482	310			2	2
12	34	484	313		C12	35	481	307			3	6
12	35	488	307		C12	36	490	309			2	2
12	36	492	308		C12	37	491	308			1	0
12	37	496	312		C12	38	491	308			5	4
12	38	501	308		C12	39	497	308			4	0
12	39	500	306		C12	40	496	307			4	1
12	40	503	312		C12	41	499	311			4	1
12	41	506	318		C12	42	501	318			5	0
12	42	515	321		C12	43	505	318			10	3
12	43	514	322		C12	44	513	321			1	1
12	44	514	322		C12	45	514	322			0	0
12	45	517	323		C12	46	513	321			4	2
12	46	519	320		C12	47	512	321			7	1
12	47	520	321		C12	48	513	321			7	0
12	48	520	321		C12	49	518	328			2	7
12	49	520	328		C12	50	517	329			3	1
12	50	525	326		C12	51	519	327			6	1
12	51	527	326		C12	52	523	331			4	5
12	52	527	326		C12	53	523	331			4	5
12	53	527	326		C12	54	524	331			3	5
12	54	527	326		C12	55	525	329			2	3
12	55	527	326		C12	56	527	329			0	3
12	56	527	326		C12	57	526	330			1	4
12	57	524	333		C12	58	525	333			1	0
12	58	518	339		C12	59	521	338			3	1
12	59	518	339		C12	60	520	340			2	1
12	60	515	351		C12	61	514	343			1	8
12	61	517	349		C12	62	509	345			8	4
12	62	513	352		C12	63	512	350			1	2
12	63	516	355		C12	64	513	355			3	0
12	64	516	356		C12	65	509	355			7	1
12	65	524	357		C12	66	509	356			15	1
12	66	524	363		C12	67	526	362	1		2	1
12	67	528	364		C12	68	523	364			5	0
12	68	532	362		C12	69	523	363			9	1
12	69	535	361		C12	70	524	364			11	3
12	70	536	362		C12	71	525	365			11	3
12	71	538	364		C12	72	539	364	1		1	0
12	72	541	363		C12	73	541	365			0	2
12	73	544	362		C12	74	540	367			4	5
12	74	546	362		C12	75	540	368			6	6
12	75	548	361		C12	76	538	367			10	6
12	76	547	361		C12	77	538	368			9	7
12	77	546	360		C12	78	541	365			5	5
12	78	547	358		C12	79	542	367			5	9
12	79	545	356		C12	80	536	366			9	10
12	80	544	358		C12	81	537	366			7	8
12	81	544	358		C12	82	537	364			7	6
12	82	544	358		C12	83	535	364			9	6
12	83	544	363		C12	84	533	363			11	0
12	84	549	357		C12	85	536	366			13	9
12	85	549	357		C12	86	550	360	1		1	3
12	86	550	357		C12	87	552	358			2	1
12	87	551	357		C12	88	554	358			3	1
12	88	552	356		C12	89	553	356			1	0
12	89	555	353		C12	90	556	357			1	4
12	90	555	356		C12	91	558	359			3	3
12	91	555	358		C12	92	558	361			3	3
Correction Rate									0.0326087
Mean Difference (Pixel)											3.94565	2.81522
Mean Difference (micron)											0.946957	0.675652
13	0	822	235		C2	1	821	235			1	0
13	1	822	235		C2	2	826	239			4	4
13	2	820	231		C2	3	828	238			8	7
13	3	820	232		C2	4	825	238			5	6
13	4	818	231		C2	5	825	232			7	1
13	5	815	232		C2	6	828	232			13	0
13	6	818	233		C2	7	831	230			13	3
13	7	821	234		C2	8	828	233			7	1
13	8	823	237		C2	9	827	232			4	5
13	9	822	237		C2	10	830	232			8	5
13	10	823	237		C2	11	830	234			7	3
13	11	825	237		C2	12	830	234			5	3
13	12	825	237		C2	13	832	234			7	3
13	13	825	238		C2	14	832	232			7	6
13	14	820	235		C2	15	833	231			13	4
13	15	822	239		C2	16	832	232			10	7
13	16	822	240		C2	17	825	244	1		3	4
13	17	827	245		C2	18	820	242			7	3
13	18	823	239		C2	19	818	241			5	2
13	19	825	240		C2	20	819	241			6	1
13	20	827	245		C2	21	820	240			7	5
13	21	828	246		C2	22	819	239			9	7
13	22	830	250		C2	23	821	240			9	10
13	23	833	252		C2	24	821	240			12	12
13	24	833	251		C2	25	821	240			12	11
13	25	828	247		C2	26	823	239			5	8
13	26	828	246		C2	27	825	240			3	6
13	27	831	249		C2	28	824	240			7	9
13	28	834	250		C2	29	824	241			10	9
13	29	833	248		C2	30	824	241			9	7
13	30	836	250		C2	31	833	248	1		3	2
13	31	835	248		C2	32	831	246			4	2
13	32	837	250		C2	33	832	246			5	4
13	33	838	250		C2	34	831	244			7	6
13	34	839	249		C2	35	832	244			7	5
13	35	837	246		C2	36	831	242			6	4
13	36	838	245		C2	37	831	241			7	4
13	37	837	241		C2	38	831	243			6	2
13	38	839	244		C2	39	831	244			8	0
13	39	840	243		C2	40	831	245			9	2
13	40	841	245		C2	41	832	246			9	1
13	41	843	248		C2	42	832	244			11	4
13	42	843	248		C2	43	833	246			10	2
13	43	844	248		C2	44	829	243			15	5
13	44	844	248		C2	45	827	244			17	4
13	45	845	248		C2	46	828	245			17	3
13	46	847	250		C2	47	830	246			17	4
13	47	846	248		C2	48	829	246			17	2
13	48	846	249		C2	49	826	244			20	5
13	49	846	251		C2	50	844	245	1		2	6
13	50	845	249		C2	51	846	238			1	11
13	51	844	247		C2	52	846	237			2	10
13	52	844	247		C2	53	845	236			1	11
13	53	843	248		C2	54	845	237			2	11
13	54	845	249		C2	55	845	236			0	13
13	55	844	249		C2	56	844	235			0	14
13	56	844	249		C2	57	844	233			0	16
13	57	846	248		C2	58	843	234			3	14
13	58	847	247		C2	59	844	234			3	13
13	59	843	243		C2	60	848	233			5	10
13	60	845	248		C2	61	848	234			3	14
13	61	845	246		C2	62	847	235			2	11
13	62	848	249		C2	63	847	235			1	14
13	63	848	249		C2	64	848	236			0	13
13	64	843	248		C2	65	848	236			5	12
13	65	843	246		C2	66	848	235			5	11
13	66	849	253		C2	67	850	246	1		1	7
13	67	850	255		C2	68	849	245			1	10
13	68	852	253		C2	69	850	243			2	10
13	69	849	250		C2	70	851	244			2	6
13	70	853	254		C2	71	850	243			3	11
13	71	855	253		C2	72	848	243			7	10
13	72	855	253		C2	73	849	244			6	9
13	73	857	256		C2	74	850	243			7	13
13	74	855	249		C2	75	850	242			5	7
13	75	858	252		C2	76	852	240			6	12
13	76	858	255		C2	77	862	255	1		4	0
13	77	860	260		C2	78	863	257			3	3
13	78	862	258		C2	79	862	256			0	2
13	79	863	259		C2	80	864	257			1	2
13	80	862	259		C2	81	864	259			2	0
13	81	862	261		C2	82	865	258			3	3
13	82	864	265		C2	83	865	256			1	9
13	83	864	262		C2	84	864	256			0	6
13	84	869	265		C2	85	863	256			6	9
13	85	865	262		C2	86	862	257			3	5
13	86	868	263		C2	87	863	256			5	7
13	87	868	266		C2	88	861	255			7	11
13	88	869	265		C2	89	861	253			8	12
13	89	863	263		C2	90	862	254			1	9
13	90	867	266		C2	91	863	255			4	11
13	91	865	266		C2	92	860	257			5	9
Correction Rate									0.0543478
Mean Difference (Pixel)											5.93478	6.63043
Mean Difference (micron)											1.42435	1.5913
14	0	922	367		C3	1	923	367			1	0
14	1	922	370		C3	2	918	368			4	2
14	2	922	370		C3	3	919	367			3	3
14	3	921	366		C3	4	916	368			5	2
14	4	923	366		C3	5	917	368			6	2
14	5	925	366		C3	6	916	368			9	2
14	6	928	366		C3	7	918	367			10	1
14	7	927	367		C3	8	917	367			10	0
14	8	929	365		C3	9	917	369			12	4
14	9	929	366		C3	10	918	369			11	3
14	10	931	364		C3	11	917	367			14	3
14	11	930	364		C3	12	918	368			12	4
14	12	930	365		C3	13	917	369			13	4
14	13	930	364		C3	14	917	369			13	5
14	14	930	366		C3	15	913	365			17	1
14	15	928	365		C3	16	915	367			13	2
14	16	931	363		C3	17	921	362			10	1
14	17	933	361		C3	18	919	358			14	3
14	18	933	363		C3	19	916	360			17	3
14	19	932	359		C3	20	916	362			16	3
14	20	933	361		C3	21	925	359	1		8	2
14	21	929	361		C3	22	923	362			6	1
14	22	927	364		C3	23	923	365			4	1
14	23	927	365		C3	24	923	365			4	0
14	24	929	365		C3	25	923	364			6	1
14	25	928	365		C3	26	924	365			4	0
14	26	928	368		C3	27	926	366			2	2
14	27	931	368		C3	28	923	364			8	4
14	28	932	368		C3	29	924	362			8	6
14	29	930	365		C3	30	922	360			8	5
14	30	926	361		C3	31	921	356			5	5
14	31	924	360		C3	32	921	355			3	5
14	32	927	357		C3	33	916	351			11	6
14	33	927	356		C3	34	917	353			10	3
14	34	923	354		C3	35	916	354			7	0
14	35	921	356		C3	36	914	354			7	2
14	36	921	357		C3	37	910	356			11	1
14	37	913	355		C3	38	905	359			8	4
14	38	906	355		C3	39	904	356			2	1
14	39	905	355		C3	40	907	355			2	0
14	40	908	355		C3	41	905	353			3	2
14	41	911	353		C3	42	907	353			4	0
14	42	911	356		C3	43	905	351			6	5
14	43	911	356		C3	44	907	354			4	2
14	44	909	358		C3	45	902	359			7	1
14	45	905	360		C3	46	905	359			0	1
14	46	905	360		C3	47	903	361			2	1
14	47	903	359		C3	48	905	360			2	1
14	48	903	359		C3	49	905	358			2	1
14	49	906	356		C3	50	899	361			7	5
14	50	910	359		C3	51	900	361			10	2
14	51	913	359		C3	52	915	357	1		2	2
14	52	915	356		C3	53	911	354			4	2
14	53	914	356		C3	54	913	354			1	2
14	54	914	357		C3	55	916	356			2	1
14	55	911	361		C3	56	920	359			9	2
14	56	909	363		C3	57	923	364			14	1
14	57	910	363		C3	58	923	360			13	3
14	58	911	363		C3	59	909	368	1		2	5
14	59	913	364		C3	60	915	366			2	2
14	60	914	365		C3	61	917	372			3	7
14	61	916	365		C3	62	913	379			3	14
14	62	918	365		C3	63	912	377			6	12
14	63	922	363		C3	64	911	372			11	9
14	64	926	361		C3	65	913	372			13	11
14	65	928	360		C3	66	931	361	1		3	1
14	66	928	362		C3	67	931	360			3	2
14	67	929	361		C3	68	930	367			1	6
14	68	928	360		C3	69	931	371			3	11
14	69	926	359		C3	70	929	368			3	9
14	70	923	359		C3	71	925	368			2	9
14	71	920	360		C3	72	922	357			2	3
14	72	921	362		C3	73	928	352			7	10
14	73	924	365		C3	74	922	361			2	4
14	74	925	363		C3	75	921	363			4	0
14	75	925	363		C3	76	923	364			2	1
14	76	924	364		C3	77	923	364			1	0
14	77	923	356		C3	78	920	365			3	9
14	78	923	357		C3	79	923	354	1		0	3
14	79	923	354		C3	80	922	352			1	2
14	80	927	353		C3	81	920	348			7	5
14	81	926	347		C3	82	924	351			2	4
14	82	927	349		C3	83	925	351			2	2
14	83	928	347		C3	84	921	347			7	0
14	84	930	344		C3	85	926	348			4	4
14	85	932	343		C3	86	937	343	1		5	0
14	86	935	342		C3	87	942	343			7	1
14	87	939	339		C3	88	939	344			0	5
14	88	940	337		C3	89	939	345			1	8
14	89	942	335		C3	90	938	342			4	7
14	90	939	334		C3	91	933	345			6	11
14	91	941	335		C3	92	933	347			8	12
Correction Rate									0.0652174
Mean Difference (Pixel)											6.04348	3.47826
Mean Difference (micron)											1.45043	0.834783
15	0	808	405		C9	1	807	404			1	1
15	1	808	404		C9	2	808	402			0	2
15	2	808	400		C9	3	813	396			5	4
15	3	808	400		C9	4	813	398			5	2
15	4	809	400		C9	5	817	399			8	1
15	5	809	398		C9	6	814	399			5	1
15	6	809	399		C9	7	815	395			6	4
15	7	812	394		C9	8	814	395			2	1
15	8	812	395		C9	9	813	396			1	1
15	9	811	396		C9	10	811	396			0	0
15	10	809	396		C9	11	812	396			3	0
15	11	809	396		C9	12	818	393			9	3
15	12	812	396		C9	13	818	385			6	11
15	13	805	398		C9	14	814	386			9	12
15	14	805	400		C9	15	808	390			3	10
15	15	802	400		C9	16	799	395			3	5
15	16	798	400		C9	17	796	400			2	0
15	17	797	402		C9	18	798	401			1	1
15	18	797	402		C9	19	800	404			3	2
15	19	795	403		C9	20	796	405			1	2
15	20	793	405		C9	21	794	405			1	0
15	21	792	409		C9	22	794	405			2	4
15	22	798	407		C9	23	792	401			6	6
15	23	797	404		C9	24	789	399			8	5
15	24	795	404		C9	25	791	399			4	5
15	25	794	406		C9	26	796	399			2	7
15	26	796	404		C9	27	796	395			0	9
15	27	796	403		C9	28	796	394			0	9
15	28	798	401		C9	29	794	393			4	8
15	29	799	401		C9	30	800	404	1		1	3
15	30	795	403		C9	31	800	401			5	2
15	31	793	401		C9	32	798	397			5	4
15	32	793	403		C9	33	801	400			8	3
15	33	795	402		C9	34	798	400			3	2
15	34	795	404		C9	35	797	402			2	2
15	35	794	406		C9	36	796	401			2	5
15	36	793	410		C9	37	791	402			2	8
15	37	793	411		C9	38	790	400			3	11
15	38	793	410		C9	39	791	403			2	7
15	39	791	409		C9	40	794	410			3	1
15	40	786	411		C9	41	792	412			6	1
15	41	787	410		C9	42	791	414			4	4
15	42	790	412		C9	43	787	410			3	2
15	43	784	407		C9	44	789	410			5	3
15	44	784	404		C9	45	792	414			8	10
15	45	787	395		C9	46	790	400	1		3	5
15	46	788	396		C9	47	790	400			2	4
15	47	787	397		C9	48	791	399			4	2
15	48	786	397		C9	49	788	401			2	4
15	49	785	397		C9	50	785	398			0	1
15	50	777	389		C9	51	779	390			2	1
15	51	774	390		C9	52	775	396			1	6
15	52	761	377		C9	53	762	379	1		1	2
15	53	759	377		C9	54	763	386			4	9
15	54	757	370		C9	55	753	369	1		4	1
15	55	754	368		C9	56	754	368			0	0
15	56	750	359		C9	57	755	366			5	7
15	57	751	361		C9	58	758	368			7	7
15	58	746	360		C9	59	759	373			13	13
15	59	744	362		C9	60	747	380			3	18
15	60	744	363		C9	61	746	385			2	22
15	61	748	362		C9	62	752	366	1		4	4
15	62	749	365		C9	63	751	365			2	0
15	63	748	364		C9	64	750	367			2	3
15	64	748	367		C9	65	749	368			1	1
15	65	746	371		C9	66	750	371			4	0
15	66	750	374		C9	67	752	372			2	2
15	67	749	370		C9	68	752	370			3	0
15	68	749	371		C9	69	751	372			2	1
15	69	746	371		C9	70	747	373			1	2
15	70	746	371		C9	71	749	370			3	1
15	71	742	372		C9	72	749	369			7	3
15	72	742	371		C9	73	748	368			6	3
15	73	741	373		C9	74	746	368			5	5
15	74	739	375		C9	75	744	369			5	6
15	75	737	379		C9	76	747	367			10	12
15	76	734	379		C9	77	741	364			7	15
15	77	740	376		C9	78	738	364			2	12
15	78	736	378		C9	79	737	365			1	13
15	79	734	376		C9	80	738	365			4	11
15	80	731	381		C9	81	737	369			6	12
15	81	732	382		C9	82	737	370			5	12
15	82	732	382		C9	83	730	374			2	8
15	83	733	383		C9	84	733	381			0	2
15	84	732	384		C9	85	733	382			1	2
15	85	732	384		C9	86	731	381			1	3
15	86	730	380		C9	87	731	379			1	1
15	87	730	380		C9	88	730	382			0	2
15	88	730	382		C9	89	728	385			2	3
15	89	728	385		C9	90	726	384			2	1
15	90	727	383		C9	91	724	384			3	1
15	91	727	383		C9	92	726	385			1	2
Correction Rate									0.0543478
Mean Difference (Pixel)											3.36957	4.66304
Mean Difference (micron)											0.808696	1.11913
16	0	608	449		C8	1	605	448			3	1
16	1	611	449		C8	2	605	445			6	4
16	2	611	449		C8	3	616	440			5	9
16	3	611	449		C8	4	616	438			5	11
16	4	613	451		C8	5	619	438			6	13
16	5	616	452		C8	6	621	443			5	9
16	6	619	452		C8	7	624	444			5	8
16	7	622	454		C8	8	622	446			0	8
16	8	624	454		C8	9	621	448			3	6
16	9	624	455		C8	10	623	447			1	8
16	10	623	454		C8	11	620	448			3	6
16	11	623	453		C8	12	620	452			3	1
16	12	622	451		C8	13	617	448			5	3
16	13	618	451		C8	14	614	448			4	3
16	14	618	454		C8	15	620	451			2	3
16	15	619	449		C8	16	622	459			3	10
16	16	616	445		C8	17	622	463			6	18
16	17	616	447		C8	18	624	461			8	14
16	18	617	449		C8	19	620	443			3	6
16	19	624	445		C8	20	618	439			6	6
16	20	624	442		C8	21	619	439			5	3
16	21	623	440		C8	22	614	437			9	3
16	22	627	434		C8	23	614	438			13	4
16	23	627	433		C8	24	614	439			13	6
16	24	628	433		C8	25	614	442			14	9
16	25	629	432		C8	26	615	446			14	14
16	26	630	434		C8	27	614	447			16	13
16	27	632	436		C8	28	627	439	1		5	3
16	28	632	435		C8	29	622	439			10	4
16	29	633	437		C8	30	625	438			8	1
16	30	632	440		C8	31	622	434			10	6
16	31	635	437		C8	32	626	431			9	6
16	32	641	433		C8	33	627	433			14	0
16	33	642	435		C8	34	630	437			12	2
16	34	640	433		C8	35	629	434			11	1
16	35	643	437		C8	36	629	431			14	6
16	36	642	440		C8	37	629	429			13	11
16	37	642	441		C8	38	628	426			14	15
16	38	639	442		C8	39	628	426			11	16
16	39	637	440		C8	40	633	429			4	11
16	40	641	441		C8	41	632	428			9	13
16	41	643	443		C8	42	630	427			13	16
16	42	646	444		C8	43	644	441	1		2	3
16	43	645	443		C8	44	647	443			2	0
16	44	647	440		C8	45	649	445			2	5
16	45	647	434		C8	46	651	448			4	14
16	46	653	431		C8	47	651	449			2	18
16	47	654	430		C8	48	648	448			6	18
16	48	657	425		C8	49	661	426	1		4	1
16	49	662	423		C8	50	663	426			1	3
16	50	662	424		C8	51	663	427			1	3
16	51	661	427		C8	52	665	428			4	1
16	52	665	425		C8	53	667	428			2	3
16	53	666	424		C8	54	669	428			3	4
16	54	670	425		C8	55	668	429			2	4
16	55	667	426		C8	56	673	426			6	0
16	56	667	428		C8	57	675	431			8	3
16	57	665	430		C8	58	676	433			11	3
16	58	665	432		C8	59	677	437			12	5
16	59	666	433		C8	60	677	438			11	5
16	60	681	436		C8	61	676	436			5	0
16	61	681	438		C8	62	676	437			5	1
16	62	685	442		C8	63	677	437			8	5
16	63	691	446		C8	64	689	452	1		2	6
16	64	692	445		C8	65	689	451			3	6
16	65	701	450		C8	66	689	453			12	3
16	66	699	450		C8	67	691	452			8	2
16	67	704	451		C8	68	691	451			13	0
16	68	706	458		C8	69	692	451			14	7
16	69	709	459		C8	70	709	463	1		0	4
16	70	716	464		C8	71	707	462			9	2
16	71	718	459		C8	72	706	462			12	3
16	72	731	465		C8	73	728	458	1		3	7
16	73	732	465		C8	74	726	460			6	5
16	74	734	465		C8	75	728	463			6	2
16	75	737	466		C8	76	727	467			10	1
16	76	740	471		C8	77	727	472			13	1
16	77	743	473		C8	78	732	473			11	0
16	78	745	474		C8	79	730	477			15	3
16	79	748	476		C8	80	729	478			19	2
16	80	748	479		C8	81	729	476			19	3
16	81	753	480		C8	82	736	477			17	3
16	82	753	481		C8	83	737	481			16	0
16	83	755	479		C8	84	749	479			6	0
16	84	755	481		C8	85	749	478			6	3
16	85	755	483		C8	86	750	481			5	2
16	86	755	480		C8	87	749	482			6	2
16	87	755	479		C8	88	750	485			5	6
16	88	754	481		C8	89	750	485			4	4
16	89	753	482		C8	90	751	484			2	2
16	90	753	481		C8	91	750	485			3	4
16	91	755	485		C8	92	750	486			5	1
Correction Rate									0.0652174
Mean Difference (Pixel)											7.32609	5.3587
Mean Difference (micron)											1.75826	1.28609
17	0	636	574		C7	1	634	575			2	1
17	1	637	574		C7	2	632	574			5	0
17	2	637	574		C7	3	634	573			3	1
17	3	636	576		C7	4	633	570			3	6
17	4	636	578		C7	5	635	571			1	7
17	5	635	579		C7	6	635	574			0	5
17	6	636	580		C7	7	632	575			4	5
17	7	639	578		C7	8	629	575			10	3
17	8	638	577		C7	9	634	577			4	0
17	9	640	578		C7	10	632	579			8	1
17	10	640	578		C7	11	631	580			9	2
17	11	640	578		C7	12	638	583			2	5
17	12	639	578		C7	13	640	582			1	4
17	13	638	578		C7	14	637	582			1	4
17	14	638	578		C7	15	635	580			3	2
17	15	638	578		C7	16	639	577			1	1
17	16	643	578		C7	17	637	574			6	4
17	17	640	574		C7	18	637	576			3	2
17	18	640	575		C7	19	637	576			3	1
17	19	640	575		C7	20	640	573			0	2
17	20	640	575		C7	21	646	572			6	3
17	21	654	568		C7	22	654	568			0	0
17	22	658	565		C7	23	658	567			0	2
17	23	661	567		C7	24	662	569			1	2
17	24	658	556		C7	25	657	556			1	0
17	25	658	556		C7	26	660	553			2	3
17	26	660	546		C7	27	660	552			0	6
17	27	659	552		C7	28	658	557			1	5
17	28	659	553		C7	29	660	559			1	6
17	29	663	555		C7	30	665	561			2	6
17	30	665	562		C7	31	670	561			5	1
17	31	673	560		C7	32	673	562			0	2
17	32	681	563		C7	33	677	564			4	1
17	33	679	561		C7	34	677	562			2	1
17	34	677	557		C7	35	677	562			0	5
17	35	676	559		C7	36	678	562			2	3
17	36	676	560		C7	37	683	562			7	2
17	37	688	565		C7	38	687	564			1	1
17	38	689	562		C7	39	686	563			3	1
17	39	685	561		C7	40	686	565			1	4
17	40	688	564		C7	41	689	567			1	3
17	41	689	564		C7	42	691	568			2	4
17	42	695	565		C7	43	690	565			5	0
17	43	688	564		C7	44	692	566			4	2
17	44	691	566		C7	45	696	565			5	1
17	45	694	563		C7	46	695	562			1	1
17	46	694	560		C7	47	696	562			2	2
17	47	697	561		C7	48	703	563			6	2
17	48	704	561		C7	49	706	562			2	1
17	49	704	560		C7	50	710	564			6	4
17	50	711	562		C7	51	712	562			1	0
17	51	709	561		C7	52	717	564			8	3
17	52	717	562		C7	53	716	563			1	1
17	53	716	562		C7	54	717	564			1	2
17	54	716	562		C7	55	715	561			1	1
17	55	716	558		C7	56	720	561			4	3
17	56	719	559		C7	57	718	559			1	0
17	57	718	558		C7	58	722	561			4	3
17	58	720	559		C7	59	726	559			6	0
17	59	726	557		C7	60	728	562			2	5
17	60	727	557		C7	61	728	564			1	7
17	61	728	561		C7	62	729	565			1	4
17	62	727	566		C7	63	731	568			4	2
17	63	731	569		C7	64	733	566			2	3
17	64	734	567		C7	65	737	566			3	1
17	65	740	565		C7	66	745	565			5	0
17	66	745	563		C7	67	747	564			2	1
17	67	751	570		C7	68	750	574			1	4
17	68	756	576		C7	69	757	577			1	1
17	69	761	578		C7	70	758	580			3	2
17	70	756	582		C7	71	757	584			1	2
17	71	756	584		C7	72	757	583			1	1
17	72	758	580		C7	73	760	584			2	4
17	73	765	584		C7	74	766	586			1	2
17	74	768	585		C7	75	771	585			3	0
17	75	773	586		C7	76	772	587			1	1
17	76	775	587		C7	77	775	587			0	0
17	77	776	586		C7	78	783	591			7	5
17	78	784	590		C7	79	784	593			0	3
17	79	788	590		C7	80	784	591			4	1
17	80	787	590		C7	81	785	593			2	3
17	81	788	594		C7	82	791	600			3	6
17	82	792	610		C7	83	790	610			2	0
17	83	791	618		C7	84	788	617			3	1
17	84	789	617		C7	85	787	615			2	2
17	85	794	627		C7	86	792	624			2	3
17	86	795	627		C7	87	786	630			9	3
17	87	778	638		C7	88	781	638			3	0
17	88	780	638		C7	89	783	638			3	0
17	89	785	637		C7	90	783	634			2	3
17	90	781	647		C7	91	783	644			2	3
17	91	783	648		C7	92	781	647			2	1
Correction Rate									0
Mean Difference (Pixel)											2.70652	2.3587
Mean Difference (micron)											0.649565	0.566087
19	0	892	676		C4	1	894	678			2	2
19	1	886	669		C4	2	890	675			4	6
19	2	888	666		C4	3	890	677			2	11
19	3	890	665		C4	4	891	679			1	14
19	4	889	667		C4	5	893	680			4	13
19	5	890	667		C4	6	895	680			5	13
19	6	892	667		C4	7	895	670	1		3	3
19	7	897	668		C4	8	897	669			0	1
19	8	897	669		C4	9	895	666			2	3
19	9	888	663		C4	10	895	666			7	3
19	10	890	667		C4	11	892	667			2	0
19	11	888	666		C4	12	891	664			3	2
19	12	881	665		C4	13	891	663			10	2
19	13	882	664		C4	14	886	669			4	5
19	14	882	668		C4	15	883	668			1	0
19	15	880	666		C4	16	884	670			4	4
19	16	884	671		C4	17	881	673			3	2
19	17	877	668		C4	18	881	673			4	5
19	18	876	671		C4	19	880	672			4	1
19	19	873	668		C4	20	876	669			3	1
19	20	868	667		C4	21	872	667			4	0
19	21	867	666		C4	22	874	668			7	2
19	22	871	664		C4	23	873	668			2	4
19	23	878	667		C4	24	873	667			5	0
19	24	874	671		C4	25	871	669			3	2
19	25	869	672		C4	26	871	672			2	0
19	26	871	674		C4	27	871	675			0	1
19	27	868	675		C4	28	872	678			4	3
19	28	870	679		C4	29	872	682			2	3
19	29	869	686		C4	30	870	685			1	1
19	30	870	686		C4	31	872	692			2	6
19	31	865	688		C4	32	870	692			5	4
19	32	866	690		C4	33	867	693			1	3
19	33	861	690		C4	34	867	693			6	3
19	34	861	686		C4	35	867	691			6	5
19	35	862	686		C4	36	865	689			3	3
19	36	858	681		C4	37	866	683			8	2
19	37	860	679		C4	38	864	683			4	4
19	38	858	681		C4	39	860	682			2	1
19	39	861	683		C4	40	856	681			5	2
19	40	861	686		C4	41	862	684			1	2
19	41	865	691		C4	42	865	687			0	4
19	42	866	690		C4	43	865	689			1	1
19	43	867	690		C4	44	868	687			1	3
19	44	865	691		C4	45	873	689			8	2
19	45	856	698		C4	46	861	693	1		5	5
19	46	854	696		C4	47	861	691			7	5
19	47	854	696		C4	48	859	689			5	7
19	48	853	695		C4	49	862	690			9	5
19	49	848	697		C4	50	858	695			10	2
19	50	848	700		C4	51	858	697			10	3
19	51	857	707		C4	52	859	698			2	9
19	52	858	707		C4	53	859	702			1	5
19	53	859	711		C4	54	860	703			1	8
19	54	863	707		C4	55	863	706	1		0	1
19	55	863	710		C4	56	867	703			4	7
19	56	862	712		C4	57	867	706			5	6
19	57	860	713		C4	58	859	711	1		1	2
19	58	859	718		C4	59	861	711			2	7
19	59	855	722		C4	60	862	715			7	7
19	60	854	724		C4	61	860	717			6	7
19	61	854	726		C4	62	853	730	1		1	4
19	62	850	725		C4	63	852	726			2	1
19	63	850	727		C4	64	852	723			2	4
19	64	852	727		C4	65	852	725			0	2
19	65	855	733		C4	66	856	722			1	11
19	66	859	732		C4	67	860	725			1	7
19	67	861	735		C4	68	861	737	1		0	2
19	68	863	737		C4	69	859	737			4	0
19	69	863	733		C4	70	861	735			2	2
19	70	864	735		C4	71	860	739			4	4
19	71	866	737		C4	72	859	734			7	3
19	72	868	738		C4	73	861	736			7	2
19	73	867	735		C4	74	867	741			0	6
19	74	869	736		C4	75	870	744			1	8
19	75	877	739		C4	76	873	749			4	10
19	76	878	741		C4	77	876	750			2	9
19	77	877	744		C4	78	873	747	1		4	3
19	78	875	744		C4	79	872	744			3	0
19	79	877	746		C4	80	871	743			6	3
19	80	880	752		C4	81	873	743			7	9
19	81	876	746		C4	82	874	743			2	3
19	82	880	749		C4	83	872	744			8	5
19	83	883	746		C4	84	874	743			9	3
19	84	883	742		C4	85	876	746			7	4
19	85	886	746		C4	86	879	750			7	4
19	86	890	752		C4	87	876	752			14	0
19	87	889	747		C4	88	890	747			1	0
19	88	888	752		C4	89	888	749			0	3
19	89	889	758		C4	90	888	749			1	9
19	90	893	758		C4	91	889	748			4	10
19	91	892	755		C4	92	887	749			5	6
Correction Rate									0.076087
Mean Difference (Pixel)											3.71739	4.07609
Mean Difference (micron)											0.892174	0.978261
20	0	401	356		C13	1	397	355			4	1
20	1	401	353		C13	2	397	358			4	5
20	2	404	351		C13	3	397	359			7	8
20	3	406	351		C13	4	397	356			9	5
20	4	404	352		C13	5	398	357			6	5
20	5	402	354		C13	6	398	356			4	2
20	6	400	354		C13	7	398	356			2	2
20	7	398	356		C13	8	398	355			0	1
20	8	397	361		C13	9	397	357			0	4
20	9	400	361		C13	10	395	357			5	4
20	10	400	364		C13	11	395	357			5	7
20	11	399	366		C13	12	395	360			4	6
20	12	400	368		C13	13	391	360			9	8
20	13	400	371		C13	14	404	373	1		4	2
20	14	400	368		C13	15	401	373			1	5
20	15	398	366		C13	16	401	373			3	7
20	16	402	368		C13	17	401	373			1	5
20	17	401	367		C13	18	402	374			1	7
20	18	401	370		C13	19	400	376			1	6
20	19	398	369		C13	20	401	375			3	6
20	20	402	373		C13	21	403	376			1	3
20	21	403	374		C13	22	403	376			0	2
20	22	402	374		C13	23	402	374			0	0
20	23	404	377		C13	24	404	378			0	1
20	24	406	379		C13	25	403	379			3	0
20	25	407	381		C13	26	403	379			4	2
20	26	411	378		C13	27	403	381			8	3
20	27	409	375		C13	28	405	382			4	7
20	28	408	378		C13	29	406	382			2	4
20	29	411	382		C13	30	405	382			6	0
20	30	412	376		C13	31	407	379			5	3
20	31	416	379		C13	32	405	380			11	1
20	32	419	384		C13	33	406	381			13	3
20	33	418	387		C13	34	404	384			14	3
20	34	421	389		C13	35	424	387	1		3	2
20	35	426	396		C13	36	425	390			1	6
20	36	428	396		C13	37	424	390			4	6
20	37	438	395		C13	38	427	392			11	3
20	38	437	395		C13	39	427	390			10	5
20	39	444	399		C13	40	425	389			19	10
20	40	439	400		C13	41	425	385			14	15
20	41	441	401		C13	42	433	403			8	2
20	42	444	400		C13	43	436	403			8	3
20	43	445	406		C13	44	438	403			7	3
20	44	447	412		C13	45	435	407			12	5
20	45	442	415		C13	46	433	410			9	5
20	46	444	416		C13	47	431	409			13	7
20	47	447	420		C13	48	428	412			19	8
20	48	448	425		C13	49	446	426	1		2	1
20	49	439	424		C13	50	447	426			8	2
20	50	440	423		C13	51	443	427			3	4
20	51	438	434		C13	52	441	430			3	4
20	52	429	432		C13	53	442	430			13	2
20	53	428	430		C13	54	443	431	1		15	1
20	54	418	431		C13	55	408	432			10	1
20	55	416	428		C13	56	408	433			8	5
20	56	419	427		C13	57	406	435			13	8
20	57	419	428		C13	58	407	434			12	6
20	58	418	427		C13	59	405	432			13	5
20	59	422	431		C13	60	405	431			17	0
20	60	423	435		C13	61	408	433			15	2
20	61	425	442		C13	62	428	442			3	0
20	62	426	439		C13	63	427	441			1	2
Correction Rate									0.0634921
Mean Difference (Pixel)											6.63492	3.98413
Mean Difference (micron)											1.59238	0.95619
28	0	247	353		C20	1	245	354			2	1
28	1	246	358		C20	2	243	358			3	0
28	2	243	361		C20	3	246	359			3	2
28	3	244	364		C20	4	246	362			2	2
28	4	237	367		C20	5	243	364			6	3
28	5	238	365		C20	6	241	365			3	0
28	6	232	365		C20	7	240	365			8	0
28	7	235	370		C20	8	241	367			6	3
28	8	235	370		C20	9	238	367			3	3
28	9	235	370		C20	10	236	369			1	1
28	10	234	369		C20	11	232	369			2	0
28	11	232	367		C20	12	234	369			2	2
28	12	234	367		C20	13	234	368			0	1
28	13	234	367		C20	14	233	368			1	1
28	14	234	368		C20	15	232	367			2	1
28	15	231	369		C20	16	233	367			2	2
28	16	231	368		C20	17	235	369			4	1
28	17	236	369		C20	18	235	371			1	2
28	18	237	374		C20	19	234	370			3	4
28	19	237	377		C20	20	234	373			3	4
28	20	236	376		C20	21	238	377			2	1
28	21	235	379		C20	22	238	379			3	0
28	22	236	379		C20	23	239	380			3	1
28	23	241	381		C20	24	240	381			1	0
28	24	236	382		C20	25	239	383			3	1
28	25	234	387		C20	26	238	384			4	3
28	26	233	388		C20	27	238	386			5	2
28	27	235	389		C20	28	236	386			1	3
28	28	237	389		C20	29	236	389			1	0
28	29	239	389		C20	30	238	390			1	1
28	30	237	388		C20	31	241	389			4	1
28	31	237	389		C20	32	239	388			2	1
28	32	236	390		C20	33	237	390			1	0
28	33	236	390		C20	34	236	390			0	0
28	34	235	391		C20	35	236	391			1	0
28	35	235	391		C20	36	236	390			1	1
28	36	235	394		C20	37	236	393			1	1
28	37	234	394		C20	38	236	394			2	0
28	38	234	394		C20	39	235	394			1	0
28	39	234	394		C20	40	235	393			1	1
28	40	234	394		C20	41	237	394			3	0
28	41	236	396		C20	42	235	395			1	1
28	42	236	396		C20	43	237	396			1	0
28	43	241	394		C20	44	236	395			5	1
28	44	240	394		C20	45	234	396			6	2
28	45	236	393		C20	46	235	394			1	1
28	46	234	395		C20	47	235	396			1	1
28	47	232	397		C20	48	234	395			2	2
28	48	232	399		C20	49	236	398			4	1
28	49	232	400		C20	50	235	400			3	0
28	50	232	399		C20	51	236	400			4	1
28	51	232	399		C20	52	235	403			3	4
28	52	230	404		C20	53	235	405			5	1
28	53	229	408		C20	54	235	406			6	2
28	54	236	406		C20	55	234	406			2	0
28	55	234	407		C20	56	232	407			2	0
28	56	233	410		C20	57	234	408			1	2
28	57	238	410		C20	58	234	409			4	1
28	58	236	408		C20	59	232	408			4	0
28	59	237	404		C20	60	230	410			7	6
28	60	235	406		C20	61	227	404			8	2
28	61	236	398		C20	62	231	402			5	4
28	62	236	397		C20	63	231	401			5	4
28	63	231	394		C20	64	231	396			0	2
28	64	231	391		C20	65	234	395			3	4
28	65	227	393		C20	66	231	395			4	2
28	66	225	396		C20	67	229	396			4	0
28	67	221	397		C20	68	227	396			6	1
28	68	227	396		C20	69	227	397			0	1
28	69	223	399		C20	70	227	398			4	1
28	70	220	401		C20	71	227	399			7	2
28	71	219	399		C20	72	226	399			7	0
28	72	221	398		C20	73	227	399			6	1
28	73	223	396		C20	74	227	397			4	1
28	74	223	396		C20	75	226	397			3	1
28	75	223	398		C20	76	226	399			3	1
28	76	222	400		C20	77	225	400			3	0
28	77	218	399		C20	78	224	402			6	3
28	78	218	400		C20	79	223	402			5	2
28	79	221	401		C20	80	222	403			1	2
28	80	220	400		C20	81	222	402			2	2
28	81	219	400		C20	82	222	402			3	2
28	82	220	402		C20	83	222	402			2	0
28	83	220	402		C20	84	222	402			2	0
28	84	220	399		C20	85	221	401			1	2
28	85	219	399		C20	86	220	399			1	0
28	86	218	399		C20	87	222	397			4	2
28	87	221	397		C20	88	223	397			2	0
28	88	224	396		C20	89	223	397			1	1
28	89	224	397		C20	90	223	398			1	1
28	90	221	397		C20	91	221	396			0	1
28	91	222	398		C20	92	223	395			1	3
Correction Rate									0
Mean Difference (Pixel)											2.86957	1.34783
Mean Difference (micron)											0.688696	0.323478
29	0	165	483		C19	1	166	484			1	1
29	1	161	481		C19	2	161	483			0	2
29	2	154	482		C19	3	161	484			7	2
29	3	156	482		C19	4	162	485			6	3
29	4	152	483		C19	5	161	484			9	1
29	5	146	488		C19	6	159	486			13	2
29	6	146	488		C19	7	157	487			11	1
29	7	144	488		C19	8	151	486			7	2
29	8	140	488		C19	9	145	493			5	5
29	9	135	485		C19	10	146	494			11	9
29	10	141	486		C19	11	147	493			6	7
29	11	142	487		C19	12	146	493			4	6
29	12	141	488		C19	13	147	492			6	4
29	13	139	489		C19	14	147	491			8	2
29	14	139	489		C19	15	152	490			13	1
29	15	138	489		C19	16	142	491			4	2
29	16	137	488		C19	17	144	488			7	0
29	17	136	482		C19	18	147	490			11	8
29	18	142	485		C19	19	151	488			9	3
29	19	143	484		C19	20	146	482			3	2
29	20	140	482		C19	21	147	483			7	1
29	21	141	480		C19	22	147	482			6	2
29	22	142	480		C19	23	146	481			4	1
29	23	144	479		C19	24	146	480			2	1
29	24	145	480		C19	25	143	481			2	1
29	25	143	480		C19	26	144	480			1	0
29	26	145	476		C19	27	143	479			2	3
29	27	143	477		C19	28	143	480			0	3
29	28	143	478		C19	29	142	479			1	1
29	29	142	478		C19	30	142	477			0	1
29	30	144	477		C19	31	142	477			2	0
29	31	144	478		C19	32	142	479			2	1
29	32	143	479		C19	33	142	481			1	2
29	33	141	479		C19	34	142	482			1	3
29	34	142	481		C19	35	141	483			1	2
29	35	143	483		C19	36	142	484			1	1
29	36	141	487		C19	37	142	486			1	1
29	37	142	486		C19	38	142	486			0	0
29	38	147	485		C19	39	143	486			4	1
29	39	144	486		C19	40	145	487			1	1
29	40	146	486		C19	41	145	486			1	0
29	41	147	483		C19	42	144	485			3	2
29	42	148	482		C19	43	145	485			3	3
29	43	149	482		C19	44	147	483			2	1
29	44	148	479		C19	45	145	481			3	2
29	45	147	479		C19	46	145	480			2	1
29	46	147	475		C19	47	148	479			1	4
29	47	150	479		C19	48	149	478			1	1
29	48	150	477		C19	49	146	478			4	1
29	49	149	479		C19	50	145	478			4	1
29	50	149	479		C19	51	146	477			3	2
29	51	149	479		C19	52	146	477			3	2
29	52	149	479		C19	53	145	478			4	1
29	53	149	479		C19	54	146	479			3	0
29	54	149	481		C19	55	146	481			3	0
29	55	148	479		C19	56	148	480			0	1
29	56	148	479		C19	57	150	478			2	1
29	57	147	482		C19	58	147	475			0	7
29	58	144	482		C19	59	142	483			2	1
29	59	144	480		C19	60	142	484			2	4
29	60	143	480		C19	61	142	483			1	3
29	61	144	483		C19	62	140	484			4	1
29	62	136	482		C19	63	140	483			4	1
29	63	140	483		C19	64	141	484			1	1
29	64	137	484		C19	65	141	484			4	0
29	65	136	485		C19	66	139	484			3	1
29	66	137	484		C19	67	139	485			2	1
29	67	136	485		C19	68	138	486			2	1
29	68	137	485		C19	69	138	485			1	0
29	69	134	484		C19	70	138	488			4	4
29	70	124	484		C19	71	137	487			13	3
29	71	130	484		C19	72	136	486			6	2
29	72	130	484		C19	73	135	487			5	3
29	73	122	488		C19	74	132	487			10	1
29	74	126	489		C19	75	128	488			2	1
29	75	121	490		C19	76	129	490			8	0
29	76	124	493		C19	77	120	498	1		4	5
29	77	119	498		C19	78	122	497			3	1
29	78	117	498		C19	79	123	497			6	1
29	79	117	501		C19	80	123	496			6	5
29	80	115	506		C19	81	121	508			6	2
29	81	116	511		C19	82	121	508			5	3
29	82	112	514		C19	83	109	516	1		3	2
29	83	107	517		C19	84	109	517			2	0
29	84	102	520		C19	85	107	519			5	1
29	85	105	523		C19	86	107	519			2	4
29	86	109	521		C19	87	108	518			1	3
29	87	109	520		C19	88	107	519			2	1
29	88	108	520		C19	89	107	517			1	3
29	89	111	519		C19	90	110	518			1	1
29	90	111	520		C19	91	110	520			1	0
29	91	108	521		C19	92	108	518			0	3
Correction Rate									0.0217391
Mean Difference (Pixel)											3.73913	1.97826
Mean Difference (micron)											0.897391	0.474783
30	0	95	538		C18	1	93	535			2	3
30	1	89	540		C18	2	93	537			4	3
30	2	84	539		C18	3	88	537			4	2
30	3	73	534		C18	4	85	536			12	2
30	4	64	535		C18	5	66	535	1		2	0
30	5	64	537		C18	6	67	535			3	2
30	6	57	532		C18	7	65	536			8	4
30	7	51	531		C18	8	48	529	1		3	2
30	8	46	534		C18	9	50	529			4	5
30	9	42	535		C18	10	49	531			7	4
30	10	37	533		C18	11	34	529	1		3	4
30	11	34	534		C18	12	36	528			2	6
30	12	29	533		C18	13	27	535			2	2
Correction Rate									0.230769
Mean Difference (Pixel)											3.48788	2.38177
Mean Difference (micron)											0.837092	0.571624
31	0	88	627		C17	1	89	629			1	2
31	1	86	629		C17	2	89	630			3	1
31	2	88	629		C17	3	91	630			3	1
31	3	90	629		C17	4	90	630			0	1
31	4	90	629		C17	5	91	631			1	2
31	5	90	629		C17	6	91	632			1	3
31	6	90	629		C17	7	91	632			1	3
31	7	90	629		C17	8	91	635			1	6
31	8	90	635		C17	9	92	639			2	4
31	9	91	638		C17	10	93	641			2	3
31	10	92	639		C17	11	94	642			2	3
31	11	92	642		C17	12	98	643			6	1
31	12	92	642		C17	13	100	642			8	0
31	13	95	642		C17	14	103	647			8	5
31	14	92	649		C17	15	102	651			10	2
31	15	91	649		C17	16	104	656			13	7
31	16	93	648		C17	17	96	653			3	5
31	17	93	648		C17	18	93	654			0	6
31	18	91	650		C17	19	93	656			2	6
31	19	92	651		C17	20	92	656			0	5
31	20	93	648		C17	21	92	652			1	4
31	21	93	649		C17	22	92	651			1	2
31	22	92	651		C17	23	94	652			2	1
31	23	96	656		C17	24	95	652			1	4
31	24	97	657		C17	25	102	659			5	2
31	25	99	656		C17	26	102	660			3	4
31	26	99	656		C17	27	103	658			4	2
31	27	102	658		C17	28	103	660			1	2
31	28	103	659		C17	29	102	661			1	2
31	29	103	660		C17	30	104	661			1	1
31	30	104	659		C17	31	104	660			0	1
31	31	108	664		C17	32	107	657			1	7
31	32	106	665		C17	33	106	658			0	7
31	33	107	668		C17	34	105	656			2	12
31	34	105	661		C17	35	109	655			4	6
31	35	103	660		C17	36	105	660			2	0
31	36	102	659		C17	37	105	660			3	1
31	37	100	658		C17	38	103	660			3	2
31	38	97	656		C17	39	99	661			2	5
31	39	95	654		C17	40	98	659			3	5
31	40	94	656		C17	41	94	659			0	3
31	41	93	659		C17	42	94	659			1	0
31	42	91	659		C17	43	94	657			3	2
31	43	88	659		C17	44	93	657			5	2
31	44	92	660		C17	45	91	659			1	1
31	45	92	658		C17	46	93	660			1	2
31	46	92	660		C17	47	93	661			1	1
31	47	95	663		C17	48	93	660			2	3
31	48	94	661		C17	49	95	660			1	1
31	49	97	664		C17	50	98	661			1	3
31	50	95	666		C17	51	100	665			5	1
31	51	99	670		C17	52	102	666			3	4
31	52	100	665		C17	53	102	667			2	2
31	53	100	667		C17	54	100	666			0	1
31	54	100	665		C17	55	101	664			1	1
31	55	101	667		C17	56	102	666			1	1
31	56	100	668		C17	57	105	670			5	2
31	57	99	667		C17	58	100	664			1	3
31	58	95	667		C17	59	97	668			2	1
31	59	96	667		C17	60	99	670			3	3
31	60	94	669		C17	61	97	672			3	3
31	61	94	671		C17	62	89	670			5	1
31	62	90	669		C17	63	87	671			3	2
31	63	91	670		C17	64	91	669			0	1
31	64	90	671		C17	65	91	668			1	3
31	65	90	672		C17	66	92	670			2	2
31	66	96	676		C17	67	98	675			2	1
31	67	95	677		C17	68	101	675			6	2
31	68	102	680		C17	69	104	677			2	3
31	69	102	682		C17	70	102	677			0	5
31	70	103	683		C17	71	103	681			0	2
31	71	100	685		C17	72	103	679			3	6
31	72	98	682		C17	73	101	679			3	3
31	73	102	679		C17	74	105	678			3	1
31	74	103	677		C17	75	104	680			1	3
31	75	105	677		C17	76	104	680			1	3
31	76	106	675		C17	77	101	680			5	5
31	77	104	677		C17	78	100	679			4	2
31	78	103	673		C17	79	100	678			3	5
31	79	100	673		C17	80	94	677			6	4
31	80	103	673		C17	81	94	679			9	6
31	81	104	672		C17	82	91	681			13	9
31	82	104	672		C17	83	96	680			8	8
31	83	104	672		C17	84	97	680			7	8
31	84	109	677		C17	85	97	680			12	3
31	85	110	677		C17	86	112	680	1		2	3
31	86	124	678		C17	87	110	677			14	1
31	87	122	680		C17	88	108	678			14	2
31	88	119	682		C17	89	111	681			8	1
Correction Rate									0.011236
Mean Difference (Pixel)											3.33005	3.00917
Mean Difference (micron)											0.799211	0.7222
32	0	245	663		C16	1	249	670			4	7
32	1	242	664		C16	2	247	669			5	5
32	2	242	665		C16	3	245	668			3	3
32	3	237	665		C16	4	244	668			7	3
32	4	240	668		C16	5	244	668			4	0
32	5	236	665		C16	6	237	670			1	5
32	6	235	666		C16	7	239	670			4	4
32	7	235	667		C16	8	239	669			4	2
32	8	233	668		C16	9	237	669			4	1
32	9	232	668		C16	10	232	670			0	2
32	10	231	668		C16	11	231	669			0	1
32	11	229	666		C16	12	231	670			2	4
32	12	224	667		C16	13	230	669			6	2
32	13	224	668		C16	14	226	668			2	0
32	14	223	668		C16	15	223	667			0	1
32	15	223	668		C16	16	222	668			1	0
32	16	223	668		C16	17	222	670			1	2
32	17	223	668		C16	18	222	670			1	2
32	18	220	671		C16	19	223	671			3	0
32	19	220	671		C16	20	223	672			3	1
32	20	220	670		C16	21	222	671			2	1
32	21	219	669		C16	22	223	671			4	2
32	22	220	666		C16	23	224	671			4	5
32	23	220	667		C16	24	223	671			3	4
32	24	220	666		C16	25	221	671			1	5
32	25	220	666		C16	26	220	671			0	5
32	26	221	667		C16	27	220	671			1	4
32	27	225	666		C16	28	217	670			8	4
32	28	227	666		C16	29	219	669			8	3
32	29	227	665		C16	30	217	669			10	4
32	30	225	664		C16	31	217	667			8	3
32	31	224	664		C16	32	219	669			5	5
32	32	223	662		C16	33	223	671			0	9
32	33	225	664		C16	34	225	671			0	7
32	34	227	664		C16	35	226	670			1	6
32	35	227	665		C16	36	227	669			0	4
32	36	227	666		C16	37	223	668			4	2
32	37	225	667		C16	38	223	667			2	0
32	38	223	664		C16	39	221	669			2	5
32	39	221	665		C16	40	220	669			1	4
32	40	219	668		C16	41	220	669			1	1
32	41	222	672		C16	42	220	670			2	2
32	42	220	671		C16	43	220	670			0	1
32	43	220	671		C16	44	219	670			1	1
32	44	225	672		C16	45	216	668			9	4
32	45	223	671		C16	46	222	665			1	6
32	46	224	671		C16	47	223	664			1	7
32	47	224	671		C16	48	223	665			1	6
32	48	224	669		C16	49	223	668			1	1
32	49	224	666		C16	50	222	667			2	1
32	50	222	665		C16	51	221	666			1	1
32	51	224	670		C16	52	222	667			2	3
32	52	225	669		C16	53	223	668			2	1
32	53	227	670		C16	54	222	669			5	1
32	54	221	666		C16	55	223	671			2	5
32	55	218	665		C16	56	221	669			3	4
32	56	214	661		C16	57	220	666			6	5
32	57	213	662		C16	58	220	668			7	6
32	58	213	663		C16	59	218	665			5	2
32	59	216	661		C16	60	215	665			1	4
32	60	219	660		C16	61	216	663			3	3
32	61	216	664		C16	62	217	661			1	3
32	62	217	658		C16	63	215	659			2	1
32	63	216	658		C16	64	214	659			2	1
32	64	216	653		C16	65	213	659			3	6
32	65	217	654		C16	66	212	659			5	5
32	66	212	661		C16	67	211	660			1	1
32	67	218	663		C16	68	210	658			8	5
32	68	219	661		C16	69	210	658			9	3
32	69	221	662		C16	70	211	657			10	5
32	70	220	657		C16	71	212	658			8	1
32	71	219	657		C16	72	214	660			5	3
32	72	215	659		C16	73	213	660			2	1
32	73	213	657		C16	74	212	658			1	1
32	74	214	657		C16	75	211	657			3	0
32	75	213	657		C16	76	210	657			3	0
32	76	212	657		C16	77	211	654			1	3
32	77	216	659		C16	78	212	653			4	6
32	78	215	662		C16	79	214	655			1	7
32	79	212	660		C16	80	211	656			1	4
32	80	212	658		C16	81	211	656			1	2
32	81	208	658		C16	82	212	654			4	4
32	82	206	660		C16	83	212	656			6	4
32	83	207	661		C16	84	211	655			4	6
32	84	205	665		C16	85	208	667			3	2
32	85	212	668		C16	86	210	668			2	0
32	86	209	670		C16	87	210	666			1	4
32	87	231	666		C16	88	230	667	1		1	1
32	88	238	651		C16	89	225	665			13	14
32	89	216	653		C16	90	223	662			7	9
32	90	204	658		C16	91	204	659			0	1
32	91	204	666		C16	91	204	659	1		0	7
Correction Rate									0.021978
Mean Difference (Pixel)											3.11957	3.28261
Mean Difference (micron)											0.748696	0.787826
33	0	414	627		C14	1	416	630			2	3
33	1	418	627		C14	2	415	631			3	4
33	2	419	629		C14	3	420	632			1	3
33	3	421	630		C14	4	420	631			1	1
33	4	425	627		C14	5	422	629			3	2
33	5	424	623		C14	6	423	629			1	6
33	6	424	625		C14	7	424	629			0	4
33	7	425	626		C14	8	426	630			1	4
33	8	430	626		C14	9	430	632			0	6
33	9	430	629		C14	10	428	632			2	3
33	10	424	628		C14	11	428	630			4	2
33	11	423	628		C14	12	428	630			5	2
33	12	423	629		C14	13	421	630			2	1
33	13	418	635		C14	14	423	629			5	6
33	14	419	636		C14	15	422	628			3	8
33	15	419	636		C14	16	421	629			2	7
33	16	416	633		C14	17	412	630			4	3
33	17	414	635		C14	18	408	636			6	1
33	18	411	637		C14	19	408	636			3	1
33	19	412	640		C14	20	414	638			2	2
33	20	417	640		C14	21	418	640			1	0
33	21	418	641		C14	22	420	640			2	1
33	22	418	641		C14	23	421	642			3	1
33	23	418	640		C14	24	420	646			2	6
33	24	416	640		C14	25	412	645			4	5
33	25	414	640		C14	26	411	646			3	6
33	26	412	640		C14	27	409	648			3	8
33	27	414	642		C14	28	409	648			5	6
33	28	413	640		C14	29	409	647			4	7
33	29	413	641		C14	30	411	646			2	5
33	30	413	641		C14	31	411	646			2	5
33	31	413	641		C14	32	412	645			1	4
33	32	413	642		C14	33	411	647			2	5
33	33	413	642		C14	34	411	646			2	4
33	34	414	643		C14	35	410	646			4	3
33	35	413	644		C14	36	411	645			2	1
33	36	414	641		C14	37	411	645			3	4
33	37	414	642		C14	38	411	645			3	3
33	38	413	643		C14	39	410	644			3	1
33	39	412	644		C14	40	409	644			3	0
33	40	412	644		C14	41	407	642			5	2
33	41	412	644		C14	42	407	641			5	3
33	42	410	643		C14	43	406	642			4	1
33	43	409	642		C14	44	407	642			2	0
33	44	409	644		C14	45	406	642			3	2
33	45	407	644		C14	46	405	646			2	2
33	46	407	642		C14	47	402	649			5	7
33	47	404	646		C14	48	401	650			3	4
33	48	402	647		C14	49	400	650			2	3
33	49	401	650		C14	50	400	651			1	1
33	50	400	652		C14	51	399	653			1	1
33	51	401	649		C14	52	403	653			2	4
33	52	402	647		C14	53	402	649			0	2
33	53	403	648		C14	54	403	650			0	2
33	54	403	648		C14	55	405	648			2	0
33	55	404	649		C14	56	399	648			5	1
33	56	409	651		C14	57	412	654	1		3	3
33	57	409	652		C14	58	412	655			3	3
33	58	408	653		C14	59	411	657			3	4
33	59	410	656		C14	60	414	658			4	2
33	60	409	657		C14	61	415	657			6	0
33	61	413	658		C14	62	414	656			1	2
33	62	413	656		C14	63	411	654			2	2
33	63	412	654		C14	64	414	656			2	2
33	64	415	655		C14	65	413	657			2	2
33	65	415	653		C14	66	414	655			1	2
33	66	413	653		C14	67	412	652			1	1
33	67	413	650		C14	68	413	650			0	0
33	68	413	647		C14	69	417	655			4	8
33	69	415	653		C14	70	417	655			2	2
33	70	417	652		C14	71	417	655			0	3
33	71	419	654		C14	72	425	655			6	1
33	72	422	655		C14	73	427	656			5	1
33	73	423	656		C14	74	424	657			1	1
33	74	424	659		C14	75	426	658			2	1
33	75	427	660		C14	76	427	661			0	1
33	76	430	664		C14	77	423	668			7	4
33	77	437	668		C14	78	444	668	1		7	0
33	78	452	667		C14	79	446	666			6	1
33	79	450	667		C14	80	451	668			1	1
33	80	460	663		C14	81	459	667			1	4
33	81	463	663		C14	82	458	665			5	2
33	82	461	664		C14	83	457	666			4	2
33	83	452	671		C14	84	459	663			7	8
33	84	451	666		C14	85	462	663			11	3
Correction Rate									0.0235294
Mean Difference (Pixel)											2.85882	2.88235
Mean Difference (micron)											0.686118	0.691765
36	0	598	684		C6	1	596	688			2	4
36	1	593	682		C6	2	594	689			1	7
36	2	593	684		C6	3	595	687			2	3
36	3	595	679		C6	4	593	688			2	9
36	4	595	679		C6	5	593	688			2	9
36	5	597	679		C6	6	595	687			2	8
36	6	597	679		C6	7	593	688			4	9
36	7	600	679		C6	8	597	686			3	7
36	8	602	683		C6	9	596	688			6	5
36	9	602	683		C6	10	600	686			2	3
36	10	603	682		C6	11	601	688			2	6
36	11	607	680		C6	12	608	683			1	3
36	12	607	681		C6	13	609	683			2	2
36	13	608	681		C6	14	609	686			1	5
36	14	616	682		C6	15	615	684			1	2
36	15	616	684		C6	16	617	685			1	1
36	16	616	684		C6	17	618	689			2	5
36	17	620	691		C6	18	616	690			4	1
36	18	621	691		C6	19	616	693			5	2
36	19	623	694		C6	20	615	695			8	1
36	20	628	693		C6	21	620	694			8	1
36	21	629	693		C6	22	619	696			10	3
36	22	633	694		C6	23	620	698			13	4
36	23	634	694		C6	24	622	697			12	3
36	24	633	689		C6	25	620	695			13	6
36	25	633	689		C6	26	622	695			11	6
36	26	633	691		C6	27	620	694			13	3
36	27	634	694		C6	28	637	693	1		3	1
36	28	636	695		C6	29	636	694			0	1
36	29	636	695		C6	30	633	695			3	0
36	30	636	695		C6	31	632	695			4	0
36	31	645	696		C6	32	638	696			7	0
36	32	647	699		C6	33	639	696			8	3
36	33	650	701		C6	34	646	702			4	1
36	34	656	701		C6	35	646	703			10	2
36	35	662	707		C6	36	651	704			11	3
36	36	664	706		C6	37	653	705			11	1
36	37	664	707		C6	38	655	707			9	0
36	38	667	704		C6	39	659	707			8	3
36	39	671	707		C6	40	662	708			9	1
36	40	673	708		C6	41	663	708			10	0
36	41	678	709		C6	42	665	709			13	0
36	42	678	708		C6	43	666	708			12	0
36	43	678	711		C6	44	665	711			13	0
36	44	680	709		C6	45	669	714			11	5
36	45	682	709		C6	46	670	713			12	4
36	46	686	706		C6	47	672	713			14	7
36	47	687	706		C6	48	672	716			15	10
36	48	687	707		C6	49	673	715			14	8
36	49	686	707		C6	50	675	713			11	6
36	50	687	709		C6	51	675	712			12	3
36	51	688	711		C6	52	675	713			13	2
36	52	687	712		C6	53	675	711			12	1
36	53	684	711		C6	54	675	708			9	3
36	54	684	712		C6	55	675	707			9	5
36	55	686	713		C6	56	675	708			11	5
36	56	686	710		C6	57	675	707			11	3
36	57	685	714		C6	58	675	708			10	6
36	58	685	714		C6	59	675	709			10	5
36	59	684	715		C6	60	678	709			6	6
36	60	683	717		C6	61	680	711			3	6
36	61	682	718		C6	62	681	709			1	9
36	62	683	718		C6	63	679	714			4	4
36	63	681	717		C6	64	676	714			5	3
36	64	681	716		C6	65	674	717			7	1
36	65	679	717		C6	66	670	714			9	3
36	66	681	714		C6	67	671	712			10	2
36	67	683	718		C6	68	675	710			8	8
36	68	681	717		C6	69	682	706			1	11
36	69	683	716		C6	70	686	717			3	1
36	70	686	715		C6	71	689	714			3	1
36	71	689	716		C6	72	688	715			1	1
36	72	689	716		C6	73	688	719			1	3
36	73	689	718		C6	74	689	720			0	2
36	74	691	717		C6	75	691	720			0	3
36	75	693	719		C6	76	691	721			2	2
36	76	692	722		C6	77	691	725			1	3
36	77	692	727		C6	78	689	725			3	2
36	78	690	723		C6	79	688	727			2	4
36	79	689	725		C6	80	687	728			2	3
36	80	687	727		C6	81	686	726			1	1
36	81	686	724		C6	82	685	729			1	5
36	82	685	727		C6	83	688	724			3	3
36	83	682	717		C6	84	687	721			5	4
36	84	679	718		C6	85	687	721			8	3
36	85	676	716		C6	86	675	714			1	2
36	86	672	712		C6	87	675	714	1		3	2
36	87	673	708		C6	88	674	708			1	0
36	88	674	711		C6	89	676	706			2	5
36	89	665	712		C6	90	676	704			11	8
36	90	667	709		C6	91	675	703			8	6
36	91	665	708		C6	92	673	701			8	7
Correction Rate									0.0217391
Mean Difference (Pixel)											6.15217	3.59783
Mean Difference (micron)											1.47652	0.863478
37	0	413	739		C15	1	410	741			3	2
37	1	413	743		C15	2	411	744			2	1
37	2	416	742		C15	3	411	743			5	1
37	3	418	742		C15	4	413	741			5	1
37	4	418	742		C15	5	412	743			6	1
37	5	414	744		C15	6	411	744			3	0
37	6	416	742		C15	7	409	744			7	2
37	7	413	743		C15	8	408	743			5	0
37	8	413	741		C15	9	409	742			4	1
37	9	417	741		C15	10	410	741			7	0
37	10	416	742		C15	11	412	742			4	0
37	11	418	739		C15	12	411	740			7	1
37	12	418	738		C15	13	412	740			6	2
37	13	421	739		C15	14	414	739			7	0
37	14	420	737		C15	15	415	738			5	1
37	15	420	736		C15	16	419	738			1	2
37	16	427	738		C15	17	420	740			7	2
37	17	421	741		C15	18	421	740			0	1
37	18	424	741		C15	19	422	741			2	0
37	19	427	742		C15	20	424	742			3	0
37	20	428	741		C15	21	426	744			2	3
37	21	431	742		C15	22	428	744			3	2
37	22	431	742		C15	23	429	743			2	1
37	23	431	742		C15	24	427	745			4	3
37	24	431	742		C15	25	426	744			5	2
37	25	432	741		C15	26	427	742			5	1
37	26	432	739		C15	27	429	743			3	4
37	27	433	739		C15	28	430	744			3	5
37	28	433	742		C15	29	431	744			2	2
37	29	427	743		C15	30	432	742			5	1
37	30	438	741		C15	31	432	742			6	1
37	31	436	741		C15	32	432	744			4	3
37	32	435	740		C15	33	432	743			3	3
37	33	435	741		C15	34	432	743			3	2
37	34	441	740		C15	35	432	742			9	2
37	35	440	736		C15	36	433	744			7	8
37	36	440	735		C15	37	437	743			3	8
37	37	441	736		C15	38	436	740			5	4
37	38	443	736		C15	39	434	738			9	2
37	39	443	735		C15	40	435	740			8	5
37	40	444	737		C15	41	432	740			12	3
37	41	445	739		C15	42	435	740			10	1
37	42	447	737		C15	43	435	741			12	4
37	43	448	736		C15	44	434	741			14	5
37	44	444	735		C15	45	437	738			7	3
37	45	449	733		C15	46	440	739			9	6
37	46	445	736		C15	47	440	741			5	5
37	47	444	737		C15	48	441	741			3	4
37	48	441	738		C15	49	444	739			3	1
37	49	442	741		C15	50	445	740			3	1
37	50	446	741		C15	51	447	741			1	0
37	51	446	740		C15	52	447	742			1	2
37	52	446	741		C15	53	447	742			1	1
37	53	446	740		C15	54	446	742			0	2
37	54	442	741		C15	55	447	741			5	0
37	55	442	741		C15	56	447	743			5	2
37	56	444	742		C15	57	445	743			1	1
37	57	445	743		C15	58	442	741			3	2
37	58	436	741		C15	59	445	741			9	0
37	59	450	740		C15	60	444	740			6	0
37	60	442	739		C15	61	450	741			8	2
37	61	448	739		C15	62	450	740			2	1
37	62	448	739		C15	63	450	740			2	1
37	63	446	738		C15	64	452	740			6	2
37	64	450	737		C15	65	454	740			4	3
37	65	447	738		C15	66	454	740			7	2
37	66	454	738		C15	67	454	738			0	0
37	67	454	736		C15	68	456	737			2	1
37	68	452	736		C15	69	456	737			4	1
37	69	458	735		C15	70	456	737			2	2
37	70	451	738		C15	71	456	736			5	2
37	71	459	738		C15	72	455	736			4	2
37	72	456	736		C15	73	456	737			0	1
37	73	457	737		C15	74	455	736			2	1
37	74	455	737		C15	75	455	737			0	0
37	75	457	737		C15	76	456	737			1	0
37	76	460	738		C15	77	457	737			3	1
37	77	460	739		C15	78	456	738			4	1
37	78	455	738		C15	79	461	736			6	2
37	79	459	735		C15	80	462	737			3	2
37	80	459	734		C15	81	459	737			0	3
37	81	458	734		C15	82	459	736			1	2
37	82	459	735		C15	83	461	737			2	2
37	83	456	736		C15	84	461	736			5	0
37	84	460	736		C15	85	465	735			5	1
37	85	467	735		C15	86	467	736			0	1
37	86	468	735		C15	87	467	735			1	0
37	87	465	735		C15	88	468	735			3	0
37	88	471	735		C15	89	469	734			2	1
37	89	470	735		C15	90	471	734			1	1
37	90	470	734		C15	91	473	734			3	0
37	91	473	732		C15	92	474	733			1	1
Correction Rate									0
Mean Difference (Pixel)											4.11957	1.76087
Mean Difference (micron)											0.988696	0.422609
38	0	816	802		C5	1	816	806			0	4
38	1	816	803		C5	2	819	807			3	4
38	2	815	805		C5	3	818	804			3	1
38	3	813	803		C5	4	818	804			5	1
38	4	814	804		C5	5	816	802			2	2
38	5	816	804		C5	6	814	802			2	2
38	6	816	804		C5	7	813	802			3	2
38	7	816	804		C5	8	811	799			5	5
38	8	816	804		C5	9	807	800			9	4
38	9	815	803		C5	10	811	806			4	3
38	10	814	805		C5	11	810	806			4	1
38	11	815	806		C5	12	813	812			2	6
38	12	815	809		C5	13	814	812			1	3
38	13	816	811		C5	14	812	810			4	1
38	14	816	811		C5	15	813	809			3	2
38	15	816	814		C5	16	811	810			5	4
38	16	816	815		C5	17	814	809			2	6
38	17	817	817		C5	18	817	811			0	6
38	18	815	817		C5	19	819	812			4	5
38	19	812	816		C5	20	814	815			2	1
38	20	811	819		C5	21	813	818			2	1
38	21	812	825		C5	22	813	820			1	5
38	22	812	824		C5	23	813	820			1	4
38	23	809	824		C5	24	805	824			4	0
38	24	808	827		C5	25	808	828			0	1
38	25	808	831		C5	26	808	829			0	2
38	26	809	835		C5	27	808	831			1	4
38	27	810	839		C5	28	808	836			2	3
38	28	811	841		C5	29	809	842			2	1
38	29	810	843		C5	30	808	843			2	0
38	30	808	850		C5	31	811	842			3	8
38	31	802	845		C5	32	811	842			9	3
38	32	801	846		C5	33	814	841			13	5
38	33	799	848		C5	34	808	846			9	2
38	34	794	849		C5	35	805	842			11	7
38	35	795	849		C5	36	807	847			12	2
38	36	790	860		C5	37	805	855			15	5
38	37	787	861		C5	38	799	849			12	12
38	38	790	862		C5	39	795	851			5	11
38	39	789	865		C5	40	796	858			7	7
38	40	787	871		C5	41	789	869	1		2	2
38	41	782	871		C5	42	790	870			8	1
38	42	782	870		C5	43	786	874			4	4
38	43	785	873		C5	44	785	873			0	0
38	44	784	875		C5	45	781	873			3	2
38	45	784	873		C5	46	777	874			7	1
38	46	780	873		C5	47	780	875			0	2
38	47	777	876		C5	48	776	873			1	3
38	48	775	876		C5	49	772	877			3	1
38	49	772	876		C5	50	771	878			1	2
38	50	772	879		C5	51	770	876			2	3
38	51	775	884		C5	52	775	876			0	8
38	52	772	884		C5	53	775	878			3	6
38	53	775	888		C5	54	774	874			1	14
38	54	776	889		C5	55	775	887	1		1	2
38	55	773	888		C5	56	772	886			1	2
38	56	773	887		C5	57	773	886			0	1
38	57	769	884		C5	58	775	886			6	2
38	58	768	884		C5	59	774	891			6	7
38	59	764	886		C5	60	774	892			10	6
38	60	767	887		C5	61	774	885			7	2
38	61	766	887		C5	62	770	890			4	3
38	62	767	887		C5	63	771	889			4	2
38	63	763	889		C5	64	769	889			6	0
38	64	753	888		C5	65	770	892			17	4
38	65	759	888		C5	66	769	895			10	7
38	66	759	889		C5	67	761	892			2	3
38	67	761	891		C5	68	762	892			1	1
38	68	763	893		C5	69	761	891			2	2
38	69	763	892		C5	70	758	891			5	1
38	70	760	892		C5	71	756	890			4	2
38	71	758	890		C5	72	757	890			1	0
38	72	760	891		C5	73	756	892			4	1
38	73	760	892		C5	74	755	890			5	2
38	74	759	890		C5	75	757	890			2	0
38	75	758	890		C5	76	756	889			2	1
38	76	759	891		C5	77	755	889			4	2
38	77	759	892		C5	78	758	890			1	2
38	78	760	897		C5	79	757	893			3	4
38	79	762	896		C5	80	755	894			7	2
38	80	759	896		C5	81	755	894			4	2
38	81	758	896		C5	82	756	896			2	0
38	82	760	896		C5	83	757	897			3	1
38	83	759	898		C5	84	751	896			8	2
38	84	758	895		C5	85	750	895			8	0
38	85	757	892		C5	86	748	895			9	3
38	86	755	893		C5	87	745	891			10	2
38	87	753	891		C5	88	744	890			9	1
38	88	749	887		C5	89	744	891			5	4
38	89	747	884		C5	90	745	890			2	6
38	90	748	887		C5	91	747	890			1	3
38	91	748	892		C5	92	749	889			1	3
Correction Rate									0.0217391
Mean Difference (Pixel)											4.19565	3.07609
Mean Difference (micron)											1.00696	0.738261
39	0	502	228		C25	1	499	223			3	5
39	1	516	203		C25	2	518	199			2	4
39	2	512	224		C25	3	511	197	1		1	27
39	3	505	224		C25	4	527	202			22	22
Correction Rate									0.25
Mean Difference (Pixel)											7	14.5
Mean Difference (micron)											1.68	3.48
40	0	467	208		C24	1	462	216			5	8
40	1	470	200		C24	2	467	225			3	25
Correction Rate									0
Mean Difference (Pixel)											4	16.5
Mean Difference (micron)											0.96	3.96
55	0	148	335		C21	1	148	337			0	2
55	1	145	336		C21	2	154	334			9	2
55	2	142	337		C21	3	154	336			12	1
55	3	140	340		C21	4	145	339	1		5	1
55	4	143	336		C21	5	159	344			16	8
55	5	138	333		C21	6	148	351			10	18
55	6	132	335		C21	7	139	353			7	18
55	7	118	335		C21	8	128	339			10	4
55	8	117	333		C21	9	131	348			14	15
55	9	114	333		C21	10	108	342	1		6	9
55	10	117	331		C21	11	115	329			2	2
55	11	119	329		C21	12	106	333	1		13	4
55	12	118	335		C21	13	122	343			4	8
55	13	115	336		C21	14	132	341			17	5
55	14	126	334		C21	15	143	343			17	9
55	15	126	332		C21	16	142	338			16	6
55	16	125	334		C21	17	138	332			13	2
55	17	124	336		C21	18	137	330			13	6
55	18	124	337		C21	19	135	325			11	12
55	19	125	338		C21	20	135	318			10	20
55	20	124	342		C21	21	140	325			16	17
55	21	119	348		C21	22	132	322			13	26
55	22	117	356		C21	23	134	322			17	34
55	23	121	354		C21	24	107	343	1		14	11
55	24	121	353		C21	25	106	341			15	12
55	25	117	347		C21	26	108	339			9	8
55	26	119	350		C21	27	107	338			12	12
55	27	119	347		C21	28	107	340			12	7
55	28	116	346		C21	29	106	339			10	7
55	29	116	341		C21	30	109	338			7	3
55	30	117	344		C21	31	108	334			9	10
55	31	119	342		C21	32	113	328			6	14
55	32	118	345		C21	33	101	348	1		17	3
55	33	116	343		C21	34	102	347			14	4
55	34	114	339		C21	35	102	347			12	8
55	35	107	346		C21	36	101	351			6	5
55	36	111	348		C21	37	101	351			10	3
55	37	113	345		C21	38	103	353			10	8
55	38	106	348		C21	39	103	354			3	6
55	39	107	343		C21	40	104	350			3	7
55	40	106	346		C21	41	102	350			4	4
55	41	102	345		C21	42	103	351			1	6
55	42	101	348		C21	43	104	352			3	4
55	43	99	343		C21	44	103	352			4	9
55	44	102	347		C21	45	103	354			1	7
55	45	105	334		C21	46	101	356			4	22
55	46	104	340		C21	47	99	353			5	13
55	47	104	340		C21	48	101	349			3	9
55	48	106	336		C21	49	102	349			4	13
55	49	103	340		C21	50	104	351			1	11
55	50	106	334		C21	51	104	352			2	18
55	51	106	334		C21	52	103	351			3	17
55	52	108	334		C21	53	97	350			11	16
55	53	102	340		C21	54	96	352			6	12
55	54	96	335		C21	55	96	353			0	18
55	55	91	331		C21	56	96	355			5	24
55	56	88	339		C21	57	97	355			9	16
55	57	95	344		C21	58	97	357			2	13
55	58	91	351		C21	59	102	356			11	5
55	59	83	350		C21	60	106	355			23	5
55	60	83	352		C21	61	106	354			23	2
55	61	86	350		C21	62	88	350	1		2	0
55	62	87	350		C21	63	87	350			0	0
55	63	84	349		C21	64	86	349			2	0
55	64	78	357		C21	65	86	341			8	16
55	65	75	362		C21	66	85	337			10	25
55	66	74	364		C21	67	83	340			9	24
55	67	72	365		C21	68	85	343			13	22
55	68	70	367		C21	69	70	371	1		0	4
55	69	73	374		C21	70	74	360			1	14
55	70	67	376		C21	71	74	365			7	11
55	71	63	381		C21	72	66	381			3	0
55	72	63	385		C21	73	57	376			6	9
55	73	62	388		C21	74	53	378			9	10
55	74	60	385		C21	75	62	383	1		2	2
55	75	60	384		C21	76	54	387			6	3
55	76	58	386		C21	77	55	373			3	13
55	77	60	390		C21	78	56	400	1		4	10
55	78	57	397		C21	79	62	407			5	10
55	79	45	399		C21	80	62	410			17	11
55	80	45	403		C21	81	43	409			2	6
55	81	39	408		C21	82	41	415	1		2	7
55	82	39	404		C21	83	44	411			5	7
55	83	39	398		C21	84	47	408			8	10
Correction Rate									0.119048
Mean Difference (Pixel)											7.96429	9.70238
Mean Difference (micron)											1.91143	2.32857
56	0	359	131		C1	1	357	130			2	1
56	1	360	130		C1	2	347	133			13	3
56	2	360	131		C1	3	346	135			14	4
56	3	360	133		C1	4	348	136			12	3
56	4	360	133		C1	5	349	136			11	3
56	5	360	133		C1	6	351	139			9	6
56	6	361	133		C1	7	351	139			10	6
56	7	361	133		C1	8	351	140			10	7
56	8	362	136		C1	9	353	141			9	5
56	9	368	139		C1	10	356	142			12	3
56	10	368	139		C1	11	356	143			12	4
56	11	368	139		C1	12	358	143			10	4
56	12	368	139		C1	13	361	143			7	4
56	13	372	138		C1	14	364	143			8	5
56	14	377	138		C1	15	365	141			12	3
56	15	377	138		C1	16	366	141			11	3
56	16	378	138		C1	17	370	140			8	2
56	17	384	138		C1	18	372	140			12	2
56	18	384	137		C1	19	375	140			9	3
56	19	388	137		C1	20	375	138			13	1
56	20	388	136		C1	21	375	138			13	2
56	21	388	135		C1	22	377	136			11	1
56	22	391	134		C1	23	377	136			14	2
56	23	391	133		C1	24	376	134			15	1
56	24	389	133		C1	25	377	135			12	2
56	25	389	133		C1	26	377	135			12	2
56	26	389	133		C1	27	379	134			10	1
56	27	391	133		C1	28	381	134			10	1
56	28	396	131		C1	29	382	135			14	4
56	29	396	131		C1	30	386	134			10	3
56	30	397	131		C1	31	392	133			5	2
56	31	402	130		C1	32	395	132			7	2
56	32	402	130		C1	33	398	131			4	1
56	33	410	126		C1	34	402	128			8	2
56	34	413	125		C1	35	403	126			10	1
56	35	414	124		C1	36	404	122			10	2
56	36	415	121		C1	37	405	121			10	0
56	37	415	121		C1	38	409	118			6	3
56	38	416	116		C1	39	409	116			7	0
56	39	421	110		C1	40	411	113			10	3
56	40	424	107		C1	41	412	110			12	3
56	41	423	107		C1	42	414	111			9	4
56	42	423	108		C1	43	417	110			6	2
56	43	426	109		C1	44	420	110			6	1
56	44	429	111		C1	45	423	110			6	1
56	45	431	110		C1	46	424	110			7	0
56	46	432	110		C1	47	426	109			6	1
56	47	435	110		C1	48	427	106			8	4
56	48	434	109		C1	49	426	105			8	4
56	49	434	108		C1	50	428	106			6	2
56	50	434	108		C1	51	434	106			0	2
56	51	438	107		C1	52	433	106			5	1
56	52	439	107		C1	53	434	106			5	1
56	53	440	108		C1	54	433	106			7	2
56	54	440	108		C1	55	430	103			10	5
56	55	439	107		C1	56	430	102			9	5
56	56	439	107		C1	57	429	100			10	7
56	57	437	104		C1	58	428	100			9	4
56	58	437	104		C1	59	427	99			10	5
56	59	436	102		C1	60	428	98			8	4
56	60	436	102		C1	61	427	99			9	3
56	61	436	102		C1	62	426	99			10	3
56	62	435	102		C1	63	428	98			7	4
56	63	433	102		C1	64	426	98			7	4
56	64	433	102		C1	65	428	99			5	3
56	65	438	96		C1	66	429	99			9	3
56	66	437	96		C1	67	430	97			7	1
56	67	437	95		C1	68	429	96			8	1
56	68	437	95		C1	69	428	95			9	0
56	69	436	93		C1	70	428	96			8	3
56	70	435	93		C1	71	429	97			6	4
56	71	436	94		C1	72	431	97			5	3
56	72	441	99		C1	73	433	97			8	2
56	73	442	95		C1	74	433	98			9	3
56	74	442	95		C1	75	436	96			6	1
56	75	444	93		C1	76	439	97			5	4
56	76	448	94		C1	77	443	98			5	4
56	77	455	99		C1	78	447	99			8	0
56	78	459	101		C1	79	448	100			11	1
56	79	460	101		C1	80	450	102			10	1
56	80	460	101		C1	81	454	103			6	2
56	81	461	102		C1	82	458	104			3	2
56	82	467	104		C1	83	458	103			9	1
56	83	468	104		C1	84	461	104			7	0
56	84	470	102		C1	85	461	104			9	2
56	85	470	102		C1	86	461	105			9	3
56	86	473	104		C1	87	465	107			8	3
56	87	474	104		C1	88	469	108			5	4
56	88	478	108		C1	89	473	110			5	2
56	89	479	109		C1	90	476	110			3	1
56	90	481	109		C1	91	476	111			5	2
56	91	484	110		C1	92	478	111			6	1
Correction Rate									0
Mean Difference (Pixel)											8.43478	2.56522
Mean Difference (micron)											2.02435	0.615652
58	0	192	114		C23	1	188	114			4	0
58	1	192	111		C23	2	188	111			4	0
58	2	189	105		C23	3	199	117			10	12
58	3	182	104		C23	4	201	113			19	9
58	4	176	103		C23	5	198	114			22	11
58	5	173	102		C23	6	172	98	1		1	4
58	6	176	103		C23	7	171	92			5	11
58	7	176	103		C23	8	174	91			2	12
58	8	175	105		C23	9	176	92			1	13
58	9	172	103		C23	10	178	95			6	8
58	10	180	107		C23	11	171	95			9	12
58	11	177	105		C23	12	169	94			8	11
58	12	181	103		C23	13	170	92			11	11
58	13	187	105		C23	14	171	87			16	18
58	14	190	108		C23	15	190	106	1		0	2
58	15	212	110		C23	16	192	110			20	0
Correction Rate									0.125
Mean Difference (Pixel)											8.625	8.375
Mean Difference (micron)											2.07	2.01
